# Supplementary material
Source: PubMed Central journal article supplement (PMC3775681)
Supplement: supp_WNL.0b013e31829e6f72_Appendix-e-5_Table_2_refs.pdf [file supp_WNL.0b013e31829e6f72_Appendix-e-5_Table_2_refs.pdf]

## Appendix e-5: Table 2 references

- Ackermann BJ, Adams R. Finger movement discrimination in focal hand dystonia: Case study of a cellist. *Med Probl Perform Artist* 2005;20:77-81.
- Altenmüller E, Boullet L, Gomez-Pellin MD, Jabusch HC. Behavioral retraining in focal dystonia: Results of a long-term follow up in 72 pianists. In: Williamon A, Edwards D, Bartel L, eds. *Proceedings of International Symposium on Performance Science*. Toronto: European Association of Conservatoires, 2011: 9-10.
- Berque P, Gray H, Harkness C, McFadyen A. A combination of constraint-induced therapy and motor control retraining in the treatment of focal hand dystonia in musicians. *Med Probl Perform Artist* 2010;25:149-161.
- Buttkus F, Baur V, Jabusch HC, Paulus W, Nitsche MA, Altenmüller E. Retraining and transcranial direct current stimulation in musician's dystonia - a case report. *Mov Disord* 2010a;25:1758-1760.
- Buttkus F, Weidenmüller M, Schneider S, et al. Failure of cathodal direct current stimulation to improve fine motor control in musician's dystonia. *Mov Disord* 2010b;25:389-393.
- Buttkus F, Baur V, Jabusch HC, et al. Single-session tDCS-supported retraining does not improve fine motor control in musician's dystonia. *Restor Neurol Neurosci* 2011;29:85-90.
- Byl N, Wilson F, Merzenich M, et al. Sensory dysfunction associated with repetitive strain injuries of tendinitis and focal hand dystonia: A comparative study. *J Orthop Sports Phys Ther* 1996;23:234-244.
- Byl NN, McKenzie A. Treatment effectiveness for patients with a history of repetitive hand use and focal hand dystonia: a planned, prospective follow-up study. *Journal of hand therapy : official journal of the American Society of Hand Therapists* 2000;13:289-301.
- Byl NN, Nagajaran S, McKenzie L. Effect of sensory discrimination training on structure and function in patients with focal hand dystonia: A case series. *Arch Phys Med Rehabil* 2003;84:1505-1514.
- Byl NN, Archer ES, McKenzie A. Focal hand dystonia: effectiveness of a home program of fitness and learning-based sensorimotor and memory training. *J Hand Ther* 2009;22:183-197.
- Candia V, Elbert T, Altenmüller E, Rau H, Schafer T, Taub E. Constraint-induced movement therapy for focal hand dystonia in musicians. *Lancet* 1999;353:42-42.
- Candia V, Schafer T, Taub E, et al. Sensory motor retuning: A behavioral treatment for focal hand dystonia of pianists and guitarists. *Arch Phys Med Rehabil* 2002;83:1342-1348.
- Candia V, Wienbruch C, Elbert T, Rockstroh B, Ray W. Effective behavioral treatment of focal hand dystonia in musicians alters somatosensory cortical organization. *Proc Natl Acad Sci U S A* 2003;100:7942-7946.
- Cole R, Hallett M, Cohen LG. Double-blind trial of botulinum toxin for treatment of focal hand dystonia. *Mov Disord* 1995;10:466-471.

- Cole RA, Cohen LG, Hallett M. Treatment of musicians cramp with botulinum toxin. *Med Probl Perform Artist* 1991;6:137-143.
- de Lisle R, Speedy DB, Thompson JMD, Maurice DG. Effects of pianism retraining on three pianists with focal dystonia. *Med Probl Perform Artist* 2006;21:105-111.
- de Lisle R, Speedy DB, Thompson JMD. Pianism retraining via video conferencing as a means of assisting recovery from focal dystonia a case study. *Med Probl Perform Artist* 2010;25:126-129.
- Hayes MW, Yiannikas C. Treatment of upper limb dystonia with botulinum toxin. *J Clin Neurosci* 1996;3:124-128.
- Jabusch H-C, Altenmüller E. Three-dimensional movement analysis as a promising tool for treatment evaluation of musicians' dystonia. *Advances in neurology* 2004;94:239-245.
- Jabusch HC, Schneider U, Altenmüller E. Delta 9-tetrahydrocannabinol improves motor control in a patient with musician's dystonia. *Mov Disord* 2004a;19:990-991.
- Jabusch HC, Vauth H, Altenmüller E. Quantification of focal dystonia in pianists using scale analysis. *Mov Disord* 2004b;19:171-180.
- Jabusch HC, Zschucke D, Schmidt A, Schuele S, Altenmüller E. Focal dystonia in musicians: Treatment strategies and long-term outcome in 144 patients. *Mov Disord* 2005;20:1623-1626.
- Jabusch HC, Paulig J, Grobbach M, Boulet L, Altenmüller E. Improved motor control after alteration of somatosensory input: Prognostic value of "glove effect" in pianists with dystonia. In: Williamon A, Edwards D, Bartel L, eds. *Proceedings of International Symposium on Performance Science*. Toronto: European Association of Conservatoires, 2011: 11-16.
- Karp BI, Cole RA, Cohen LG, Grill S, Lou JS, Hallett M. Long-term botulinum toxin treatment of focal hand dystonia. *Neurology* 1994;44:70-76.
- Kember JM. Focal dystonia in a musician. *Man Ther* 1997;2:221-225.
- Lungu C, Karp BI, Alter K, Zolbrod R, Hallett M. Long-term follow-up of botulinum toxin therapy for focal hand dystonia: outcome at 10 years or more. *Mov Disord* 2011;26:750-753.
- McKenzie AL, Goldman S, Barrango C, Shrimme M, Wong T, Byl N. Differences in physical characteristics and response to rehabilitation for patients with hand dystonia: musicians' cramp compared to writers' cramp. *J Hand Ther* 2009;22:172-181.
- Pesenti A, Barbieri S, Priori A. Limb immobilization for occupational dystonia: a possible alternative treatment for selected patients. *Advances in neurology* 2004;94:247-254.
- Priori A, Pesenti A, Cappellari A, Scarlato G, Barbieri S. Limb immobilization for the treatment of focal occupational dystonia. *Neurology* 2001;57:405-409.
- Rosenkranz K, Williamon A, Butler K, Cordivari C, Lees AJ, Rothwell JC. Pathophysiological differences between musician's dystonia and writer's cramp. *Brain* 2005;128:918-931.

- Rosenkranz K, Butler K, Williamon A, Cordivari C, Lees AJ, Rothwell JC. Sensorimotor reorganization by proprioceptive training in musician's dystonia and writer's cramp. *Neurology* 2008;70:304-315.
- Rosenkranz K, Butler K, Williamon A, Rothwell JC. Regaining motor control in musician's dystonia by restoring sensorimotor organization. *J Neurosci* 2009;29:14627-14636.
- Ross MH, Charness ME, Sudarsky L, Logigian EL. Treatment of occupational cramp with botulinum toxin: Diffusion of toxin to adjacent noninjected muscles. *Muscle & nerve* 1997;20:593-598.
- Rosset-Llobet J, Fabregas-Molas S. Long-term treatment effects of sensory motor retuning in a pianist with focal dystonia. *Med Probl Perform Artist* 2011;26:106-107.
- Sakai N. Slow down exercise for the treatment of focal hand dystonia in pianists. *Med Probl Perform Artist* 2006;21:25-28.
- Schabrun SM, Stinear CM, Byblow WD, Ridding MC. Normalizing motor cortex representations in focal hand dystonia. *Cereb Cortex* 2009;19:1968-1977.
- Schuele S, Lederman RJ. Long-term outcome of focal dystonia in string instrumentalists. *Mov Disord* 2004;19:43-48.
- Schuele S, Jabusch HC, Lederman RJ, Altenmüller E. Botulinum toxin injections in the treatment of musician's dystonia. *Neurology* 2005;64:341-343.
- Schuele SU, Lederman RJ. Long-term outcome of focal dystonia in instrumental musicians. *Advances in neurology* 2004;94:261-266.
- Spector JT, Brandfonbrener AG. A new method for quantification of musician's dystonia: The frequency of abnormal movements scale. *Med Probl Perform Artist* 2005;20:157-162.
- Stinear CM, Byblow WD. Impaired modulation of corticospinal excitability following subthreshold rTMS in focal hand dystonia. *Hum Mov Sci* 2004;23:527-538.
- Tamura Y, Ueki Y, Lin P, et al. Disordered plasticity in the primary somatosensory cortex in focal hand dystonia. *Brain* 2009;132:749-755.
- Tan AK. Botulinum toxin for neurological disorders in a movement disorders clinic in Singapore. *Singapore medical journal* 1998;39:403-405.
- Taub E, Uswatte G, Pidikiti R. Constraint-Induced Movement Therapy: A new family of techniques with broad application to physical rehabilitation - A clinical review. *J Rehabil Res Dev* 1999;36:237-251.
- Tubiana R. Prolonged neuromuscular rehabilitation for musician's focal dystonia. *Med Probl Perform Artist* 2003;18:166-169.
- Turjanski N, Pirtosek Z, Quirk J, et al. Botulinum toxin in the treatment of writer's cramp. *Clin Neuropharmacol* 1996;19:314-320.
