# Supplementary material
Source: PubMed Central journal article supplement (PMC3775681)
Supplement: supp_WNL.0b013e31829e6f72_Appendix-e-7_MD_pathophysiology_study_refs.pdf [file supp_WNL.0b013e31829e6f72_Appendix-e-7_MD_pathophysiology_study_refs.pdf]

## Appendix e-7: MD pathophysiology study (e-6) references

- Ackermann BJ, Adams R. Finger movement discrimination in focal hand dystonia: Case study of a cellist. *Med Probl Perform Artist* 2005;20:77-81.
- Bara-Jimenez W, Catalan MJ, Hallett M, Gerloff C. Abnormal somatosensory homunculus in dystonia of the hand. *Ann Neurol* 1998;44:828-831.
- Berque P, Gray H, Harkness C, McFadyen A. A combination of constraint-induced therapy and motor control retraining in the treatment of focal hand dystonia in musicians. *Med Probl Perform Artist* 2010;25:149-161.
- Blood AJ, Flaherty AW, Choi JK, et al. Basal ganglia activity remains elevated after movement in focal hand dystonia. *Ann Neurol* 2004;55:744-748.
- Byl N, Hamati D, Melnick M, Wilson F, McKenzie A. The sensory consequences of repetitive strain injury in musicians: focal dystonia of the hand. *Journal of Back and Musculoskeletal Rehabilitation* 1996;7:27-39.
- Byl N, Wilson F, Merzenich M, et al. Sensory dysfunction associated with repetitive strain injuries of tendinitis and focal hand dystonia: A comparative study. *J Orthop Sports Phys Ther* 1996;23:234-244.
- Byl NN, McKenzie A, Nagarajan SS. Differences in somatosensory hand organization in a healthy flutist and a flutist with focal hand dystonia: a case report. *Journal of hand therapy : official journal of the American Society of Hand Therapists* 2000;13:302-309.
- Byl NN, Nagajaran S, McKenzie L. Effect of sensory discrimination training on structure and function in patients with focal hand dystonia: A case series. *Arch Phys Med Rehabil* 2003;84:1505-1514.
- Byl NN, Archer ES, McKenzie A. Focal hand dystonia: effectiveness of a home program of fitness and learning-based sensorimotor and memory training. *J Hand Ther* 2009;22:183-197.
- Candia V, Wienbruch C, Elbert T, Rockstroh B, Ray W. Effective behavioral treatment of focal hand dystonia in musicians alters somatosensory cortical organization. *Proc Natl Acad Sci U S A* 2003;100:7942-7946.
- Dolberg R, Hinkley LBN, Honma S, et al. Amplitude and timing of somatosensory cortex activity in task-specific focal hand dystonia. *Clin Neurophysiol* 2011;122:2441-2451.
- Ferrarin M, Rabuffetti M, Ramella M, Osio M, Mailland E, Converti RM. Does instrumented movement analysis alter, objectively confirm, or not affect clinical decision-making in musicians with focal dystonia? *Med Probl Perform Artist* 2008;23:99-106.
- Garraux G, Bauer A, Hanakawa T, Wu T, Kansaku K, Hallett M. Changes in brain anatomy in focal hand dystonia. *Ann Neurol* 2004;55:736-739.
- Granert O, Peller M, Jabusch HC, Altenmüller E, Siebner HR. Sensorimotor skills and focal dystonia are linked to putaminal grey-matter volume in pianists. *J Neurol Neurosurg Psychiatry* 2011;82:1225-1231.
- Haslinger B, Altenmüller E, Castrop F, Zimmer C, Dresel C. Sensorimotor overactivity as a pathophysiologic trait of embouchure dystonia. *Neurology* 2010;74:1790-1797.

- Kadota H, Nakajima Y, Miyazaki M, et al. An fMRI study of musicians with focal dystonia during tapping tasks. *J Neurol* 2010;257:1092-1098.
- Lim VK, Bradshaw JL, Nicholls MER, Altenmüller E. Perceptual differences in sequential stimuli across patients with musician's and writer's cramp. *Mov Disord* 2003;18:1286-1293.
- Lim VK, Bradshaw JL, Nicholls MER, et al. Aberrant sensorimotor integration in musicians' cramp patients. *J Psychophysiol* 2003;17:195-202.
- Lim VK, Bradshaw JL, Nicholls MER, Altenmüller E. Enhanced P1-N1 auditory evoked potential in patients with musicians' cramp. *Annals of the New York Academy of Sciences* 2005;1060:349-359.
- McKenzie A, Nagarajan SS, Roberts TPL, Merzenich MM. Somatosensory representation of the digits and clinical performance in patients with focal hand dystonia. *Am J Phys Med Rehabil* 2003;82:737-749.
- McKenzie AL, Goldman S, Barrango C, Shrimme M, Wong T, Byl N. Differences in physical characteristics and response to rehabilitation for patients with hand dystonia: musicians' cramp compared to writers' cramp. *J Hand Ther* 2009;22:172-181.
- Merriman L, Newmark J, Hochberg FH, Shahani B, Leffert R. A focal movement disorder of the hand in 6 pianists. *Med Probl Perform Artist* 1986;1:17-19.
- Rosenkranz K, Williamon A, Butler K, Cordivari C, Lees AJ, Rothwell JC. Pathophysiological differences between musician's dystonia and writer's cramp. *Brain* 2005;128:918-931.
- Rosenkranz K, Butler K, Williamon A, Cordivari C, Lees AJ, Rothwell JC. Sensorimotor reorganization by proprioceptive training in musician's dystonia and writer's cramp. *Neurology* 2008;70:304-315.
- Rosenkranz K, Butler K, Williamon A, Rothwell JC. Regaining motor control in musician's dystonia by restoring sensorimotor organization. *J Neurosci* 2009;29:14627-14636.
- Ruiz MH, Senghaas P, Grossbach M, et al. Defective inhibition and inter-regional phase synchronization in pianists with musician's dystonia: An EEG study. *Hum Brain Mapp* 2009;30:2689-2700.
- Ruiz MH, Strubing F, Jabusch HC, Altenmüller E. EEG oscillatory patterns are associated with error prediction during music performance and are altered in musician's dystonia. *Neuroimage* 2011;55:1791-1803.
- Schabrun SM, Stinear CM, Byblow WD, Ridding MC. Normalizing motor cortex representations in focal hand dystonia. *Cereb Cortex* 2009;19:1968-1977.
- Schmidt A, Jabusch HC, Altenmüller E, et al. Dominantly transmitted focal dystonia in families of patients with musician's cramp. *Neurology* 2006;67:691-693.
- Schuele S, Lederman RJ. Long-term outcome of focal dystonia in string instrumentalists. *Mov Disord* 2004;19:43-48.
- Stinear CM, Byblow WD. Impaired modulation of corticospinal excitability following subthreshold rTMS in focal hand dystonia. *Hum Mov Sci* 2004;23:527-538.
- Stinear CM, Byblow WD. Impaired inhibition of a pre-planned response in focal hand dystonia. *Exp Brain Res* 2004;158:207-212.

- Strubing F, Ruiz MH, Jabusch HC, Altenmüller E. Error monitoring is altered within musician's dystonia: evidence from ERP-based studies. *Ann N Y Acad Sci* 2012.
- Tamura Y, Ueki Y, Lin P, et al. Disordered plasticity in the primary somatosensory cortex in focal hand dystonia. *Brain* 2009;132:749-755.
- Walter U, Buttkus F, Benecke R, Grossmann A, Dressler D, Altenmüller E. Sonographic alteration of lenticular nucleus in focal task-specific dystonia of musicians. *Neurodegenerative diseases* 2012;9:99-103.
- Wu CC, Fairhall SL, McNair NA, et al. Impaired sensorimotor integration in focal hand dystonia patients in the absence of symptoms. *J Neurol Neurosurg Psychiatry* 2010;81:659-665.
